# Supplementary material
Source: PubMed Central journal article supplement (PMC3074381)
Supplement: NIHMS274762-supplement-1.pdf [file NIHMS274762-supplement-1.pdf]

## Supplementary information

### HDAC-mediated Deacetylation of NF- $\kappa$ B is Critical for Schwann cell Myelination

Ying Chen<sup>1,2</sup>, Haibo Wang<sup>1</sup>, Sung Ok Yoon<sup>3</sup>, Xiaomei Xu<sup>1</sup>, Michael Hottiger<sup>4</sup>, John Svaren<sup>5</sup>, Klaus A. Nave<sup>6</sup>, Haesun A. Kim<sup>7</sup>, Eric N. Olson<sup>2</sup>, and Q. Richard Lu<sup>1,2</sup>

Departments of <sup>1</sup>Developmental Biology and Kent Waldrep Foundation Center for Basic Neuroscience Research on Nerve Growth and Regeneration, <sup>2</sup>Molecular Biology, University of Texas Southwestern Medical Center, Dallas, TX 75390, USA. <sup>3</sup>Department of Molecular and Cellular Biochemistry, Center for Molecular Neurobiology, The Ohio State University, Columbus, Ohio 43210, USA. <sup>4</sup>Institute of Veterinary Biochemistry and Molecular Biology, University of Zurich, 8057 Zurich, Switzerland. <sup>5</sup>Department of Comparative Biosciences, and the Waisman Center, University of Wisconsin, Madison, Wisconsin 53705. <sup>6</sup>Max-Planck-Institute of Experimental Medicine, Department of Neurogenetics, D-37075 Goettingen, Germany. <sup>7</sup>Department of Biological Sciences, Rutgers University, Newark, NJ 07102, USA.

Corresponding author:

Email: [qrichard.lu@utsouthwestern.edu](mailto:qrichard.lu@utsouthwestern.edu)

Tel: 214-648-7410; Fax: 214-648-1960

## Supplementary Figures:

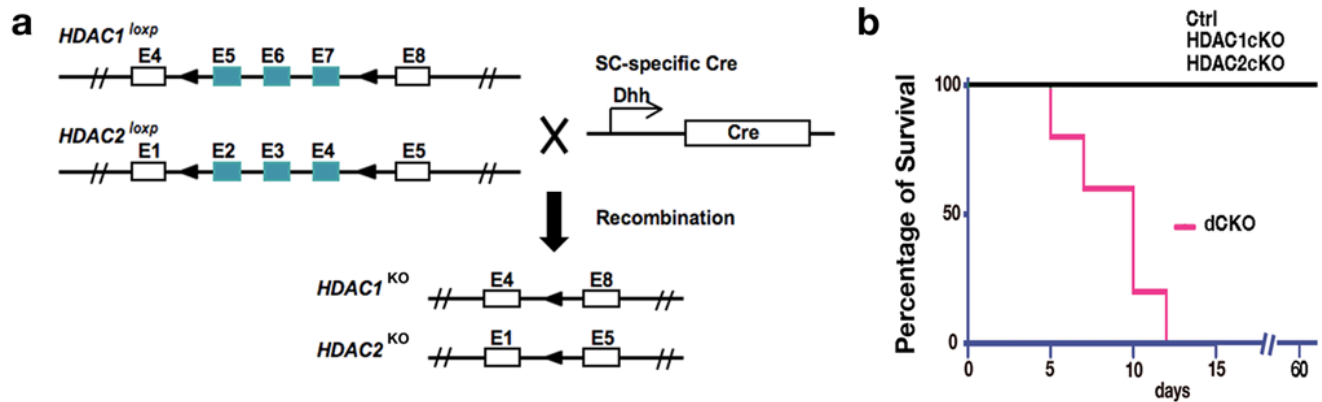

### Supplementary Figure 1. Lifespan of mice lacking HDAC1/2 in the Schwann cell lineage.

(a) Schematic diagram of *HDAC1* and *HDAC2* conditional knockout mediated by a Schwann cell lineage expressing Dhh-Cre line. (b) Survival curve of control (Ctrl) and HDAC1cKO, HDAC2cKO and double mutant (dCKO) mice (> 40 mice tested for each line).

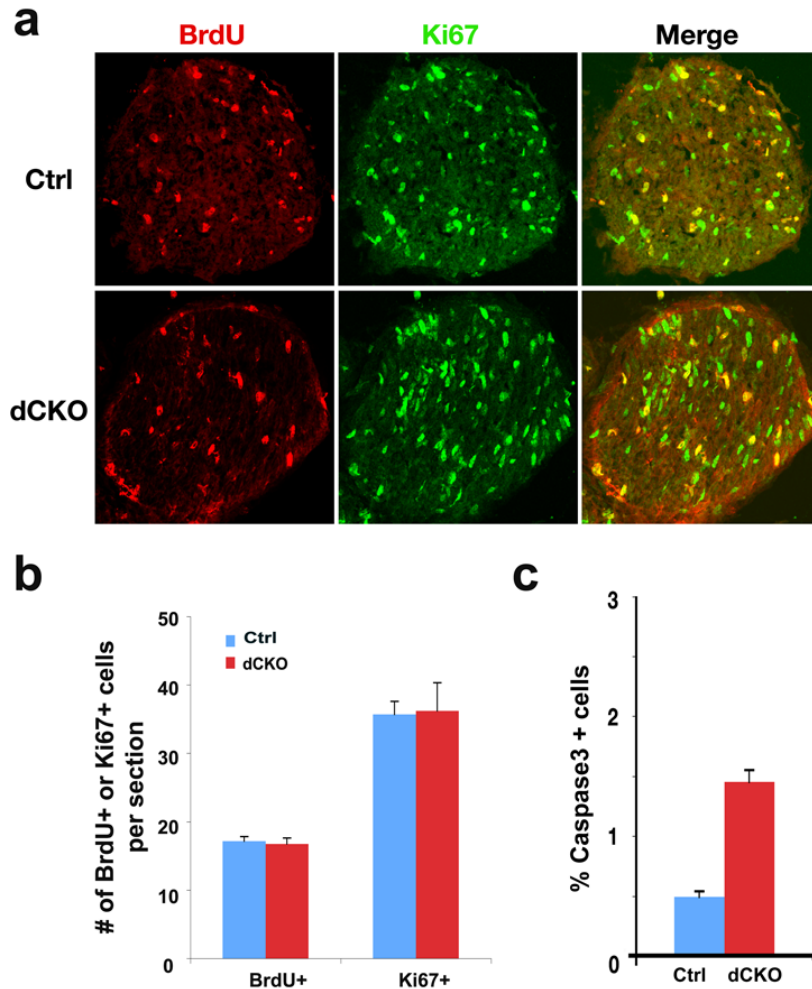

**Supplementary Figure 2. Normal formation and proliferation of immature Schwann cells in dCKO mice**

(a) Sciatic nerves of control (Ctrl) and dCKO mice at P4 after 2 hr BrdU pulse were immunostained with antibodies to proliferative markers BrdU and Ki67. Cell nuclei were counterstained with Topro3. Note: only the cells in the S-phase of the cell cycle were co-labeled with BrdU and Ki67. (b) Quantification of the number of BrdU and Ki67-positive cells per cross-section of above sciatic nerves (n = 3). (c) Sciatic nerves of control and dCKO mice at P4 were immunostained with anti-active Caspase3. The percentage of Caspase3-positive Schwann cell nuclei per cross-section was quantified.

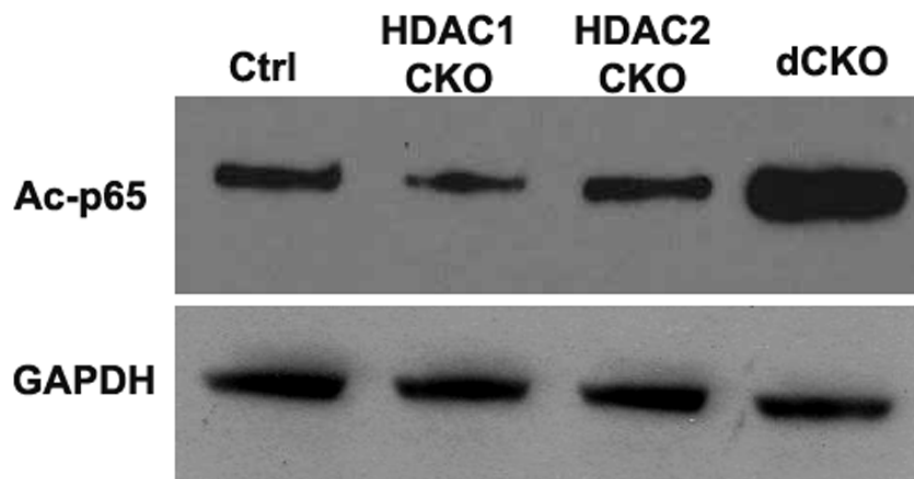

**Supplementary Figure 3. The level of acetyl p65 expression is not altered in HDAC1 or HDAC2 single mutants**

Lysates of sciatic nerves from control (Ctrl), HDAC1cKO, HDAC2cKO and dCKO at P4 were analyzed by Western blot with an antibody to acetyl-p65. GAPDH as a loading control. Note: expression of either HDAC1 or HDAC2 is capable for maintaining the deacetylation state of NF- $\kappa$ B p65.

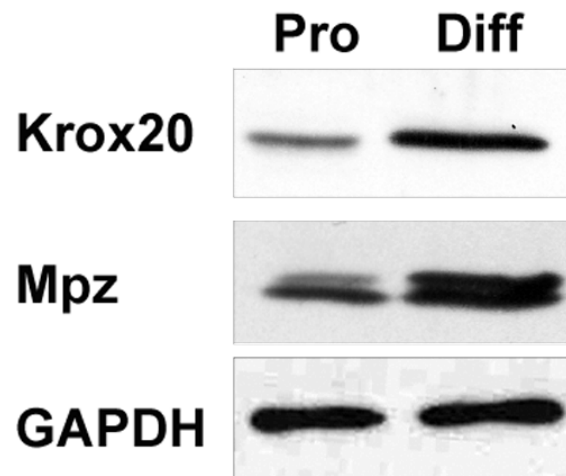

**Supplementary Figure 4. Expression of Schwann cell differentiation-associated genes under the differentiation condition**

Lysates from rat primary Schwann cells cultured in the proliferation medium (Pro) and the differentiation medium (Diff) for 4 days were immunoblotted with antibodies to differentiation markers Krox20 and Mpz. GAPDH is a loading control. Expression of Krox20 and Mpz increased under the differentiation condition.

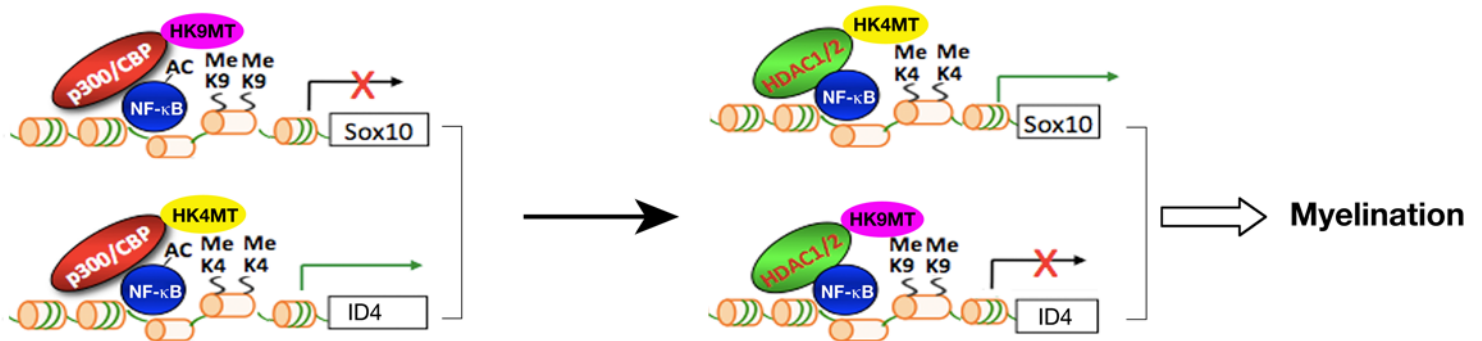

**Supplementary Figure 5. Schematic diagram showing a developmental switch of the NF- $\kappa$ B protein complex during Schwann cell differentiation.** Left panel: in immature Schwann cells or Schwann cells in the absence of HDAC1/2, p300/CBP and acetylated NF- $\kappa$ B form a complex and induce chromatin modifications, e.g. by recruiting histone3 K4 or K9 methyltransferases (HK4MT or HK9MT). The NF- $\kappa$ B/p300 complex represses expression of differentiation activators such as Sox10, while activating differentiation inhibitors such as ID4, thereby inhibiting Schwann cell differentiation. Right panel: as Schwann cells differentiate, NF- $\kappa$ B forms a complex with HDAC1/2 to induce specific chromatin configuration changes on the promoters of regulatory genes and promote the Schwann cell myelination program. The protein complex switch of NF- $\kappa$ B p65/p300 over to NF- $\kappa$ B p65/HDAC1/2 promotes Schwann cell myelination.

Figure 1c

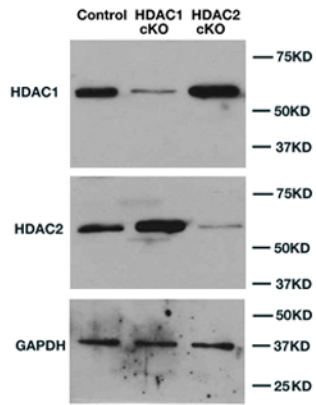

Figure 3a

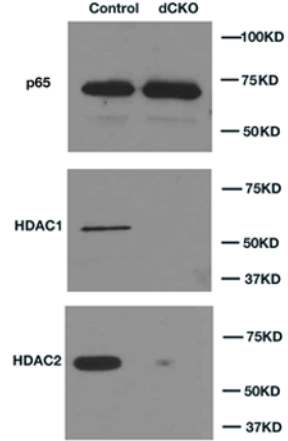

Figure 3c

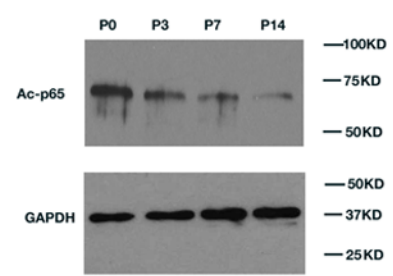

Figure 3e

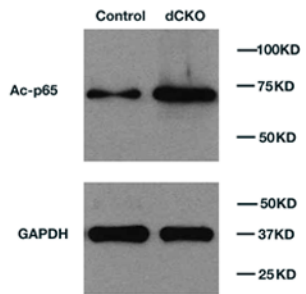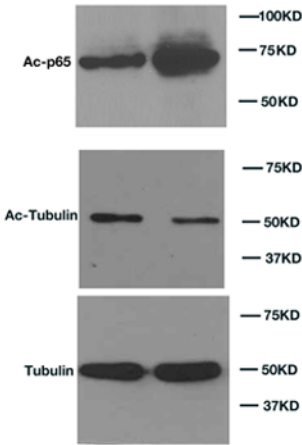

Figure 3d

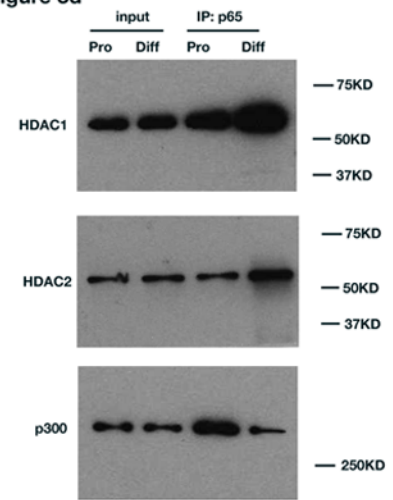

Figure 4e

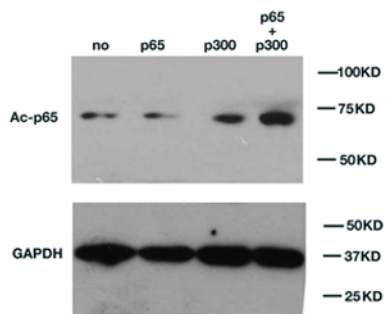

Supplementary Figure 6. Full-length blots/gels that were presented in Fig. 1, Fig. 3 and Fig. 4.
